# Supplementary material for: Regulatory Effect of Methylation of the Porcine AQP3 Gene Promoter Region on Its Expression Level and Porcine Epidemic Diarrhea Virus Resistance
Source: PubMed Central journal article supplement (PMC7599489; doi:10.3390/genes11101167), 2020-10-06
Supplement: genes-11-01167-s001.pdf [file genes-11-01167-s001.pdf]

# Regulatory Effect of Methylation of the Porcine *AQP3* Gene Promoter Region on Its Expression Level and Porcine Epidemic Diarrhea Virus Resistance

Jia-Yun Wu <sup>1</sup>, Fang Wang <sup>1</sup>, Zheng-Chang Wu <sup>1,2</sup>, Sheng-Long Wu <sup>1,2</sup> and Wen-Bin Bao <sup>1,2,\*</sup>

- <sup>1</sup> Key Laboratory for Animal Genetics, Breeding, Reproduction and Molecular Design of Jiangsu Province, College of Animal Science and Technology, Yangzhou University, Yangzhou 225009, P. R. China; YZUwujiayun@163.com (J.W.); wangfangRD@163.com (F.W.); zcwu@yzu.edu.cn (Z.W.)
  - <sup>2</sup> Joint International Research Laboratory of Agriculture & Agri-Product Safety, Yangzhou University, Yangzhou, Jiangsu, P. R. China; slwu@yzu.edu.cn (S.W.)
- \* Correspondence: wbbao@yzu.edu.cn, Tel. : +86-514-87979316

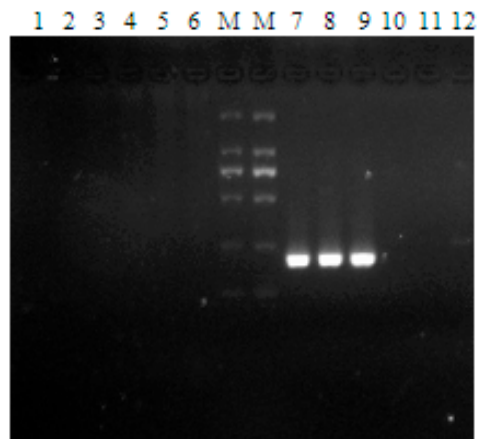

**Figure S1.** Agarose gel (1%) electrophoresis of PCR products amplified from the virus genome. Lanes 1–3, TGEV amplification products from jejunal tissues, jejunal contents and feces of diarrheal piglets, respectively; Lanes 4–6, PoRV amplification products; Lanes 7–9, PEDV amplification products; Lanes 10–12, mixed virus amplification products from jejunal tissues, jejunal contents and feces of normal piglets; M represents the 50-bp DNA ladder.

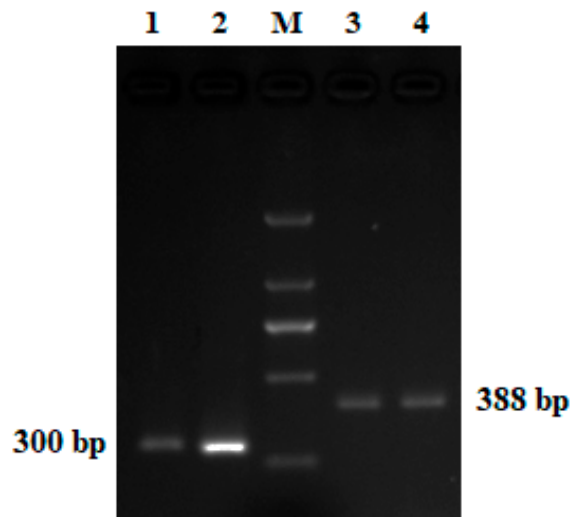

**Figure S2.** Amplification products of CpG islands primers. Lanes 1–2, amplification product of CpG1 primers; Lanes 3–4, amplification products of CpG2 primers. M represents the DL2000 marker.

**Table S1.** Information of related primers

| Name           | Accession number | Primer sequences                                                          |
|----------------|------------------|---------------------------------------------------------------------------|
| PEDV           | AF353511.1       | F: 5'-AGGTCTGCATTCCAGTGCTT-3'<br>R: 5'-GGACATAGAAAGCCCAACCA-3'            |
| TGEV           | FJ755618         | F: 5'-CAACCCTGAAACTAACGCAATTCT-3'<br>R: 5'-GCCCATCCAGTCGCACTACTT-3'       |
| PoRV           | FJ807867         | F: 5'-ATCGGGTGTCTGACTACTG-3'<br>R: 5'-TTTACTCGCATCATCCTCT-3'              |
| AQP3           | HQ888860.1       | F: 5'-TCGTGATGTTTGGCTGTGG-3'<br>R: 5'-GCCAGGTTGATGGTGAGGA-3'              |
| Sp1            | XM_005652567.3   | F: 5'-GTTTCGCTTGCCTCGTCAGC-3'<br>R: 5'-AAAGGCACCACCATTACCACT-3'           |
| GAPDH          | AF017079.1       | F: 5'-ACATCATCCCTGCTTCTACTGG -3'<br>R: 5'-CTCGGACGCCTGCTTCAC-3'           |
| $\beta$ -actin | XM_00312428.3    | F: 5'-TGGCGCGCGCGCGATGAAG-3'<br>R: 5'-ACTGGACTGGCTCGT-3'                  |
| CpG1           | HQ888860.1       | F: 5'-TTGGAGTTTATTTTTGATAG-3'<br>R: 5'-TTATCTTTTTTACCATTATTAACC-3'        |
| CpG2           | HQ888860.1       | F: 5'-GGGTTTAGTTTTAGTTAGGTTTTTTTTTTT-3'<br>R: 5'-CCCCAAACACTCAACCAATAC-3' |

**Table S2.** Information of ChIP-PCR primers

| Name   | Primer sequences                                             | Length of products (bp) |
|--------|--------------------------------------------------------------|-------------------------|
| ChIP-1 | F: 5'- ATTCAACCCCTAGCCTGG-3',<br>R: 5'-CATTTATTGGGCCGCTCC-3' | 55                      |
| ChIP-2 | F: 5'-TAGCCCCTAGGCGAGCCG -3',<br>5'-GGGTGGCGCCCTTTATAGCA-3'  | 100                     |

**Table S3.** shRNA sequences of Sp1 interference and negative control

| Name    | shRNA sequences       |
|---------|-----------------------|
| Sp1-310 | GCGCAAAGTATATGGCAAGA  |
| Sp1-484 | GCCCTAAGCGTTTCATAAGGA |
| Sp1-521 | GCATATCAAGACTCACCAGAA |
| Sp1-660 | GCCATCTGTCCAGAGGGTATT |
| Sp1-LV3 | TTCTCCGAACGTGTCACGT   |
